1 **Safety and Efficacy of Adjunctive Intra-arterial Tenecteplase**  
2 **following Successful Thrombectomy in Patients with Large**  
3 **Vessel Occlusion: A Phase 1/2 Randomized Clinical Trial**

4

5 Xianhua Hou<sup>1\*</sup>, MD, Jiacheng Huang<sup>2,3\*</sup>, MD, Changwei Guo<sup>2\*</sup>, MD Li  
6 Wang<sup>4\*</sup>, MD, Yuxuan He<sup>1\*</sup>, MD, Lin Chen<sup>1</sup>, MD, Qu Liu<sup>1</sup>, MD, Junhua  
7 Wu<sup>1</sup>, MD, Min Wu<sup>1</sup>, MD, Thanh N. Nguyen<sup>5</sup>, MD, Raul G. Nogueira<sup>6</sup>,  
8 MD, Duolao Wang<sup>7</sup>, PhD, Jeffrey L. Saver<sup>8</sup>, MD, Wenjie Zi<sup>2#</sup>, MD,  
9 Zhenhua Zhou<sup>1#</sup>, MD

10

11 **Institutions**

12 1.Department of Neurology, Southwest Hospital, Army Medical  
13 University, Chongqing, China;

14 2.Department of Neurology, Xinqiao Hospital, Army Medical University,  
15 Chongqing, China;

16 3.Department of Neurology, The Second Affiliated Hospital of  
17 Chongqing Medical University, Chongqing, China;

18 4.Department of Neurology, Zigong Third People's Hospital, Zigong,  
19 Sichuan, China;

20 5.Department of Neurology and Radiology, Boston Medical Center, USA;

21 6.UPMC Stroke Institute, Departments of Neurology and Neurosurgery,  
22 University of Pittsburgh School of Medicine, PA, USA;

23 7.Global Health Trials Unit, Liverpool School of Tropical Medicine,  
24 Liverpool, UK;

25 8.Department of Neurology and Comprehensive Stroke Center, David  
26 Geffen School of Medicine, University of California, Los Angeles, CA,  
27 USA.

28

29 \* First co-authors.

30 # Co-corresponding authors.

31 Total words: 2282

32 Number of figures: 1

33

34 Corresponding authors:

35 Zhenhua Zhou, MD

36 Department of Neurology, Southwest Hospital, Army Medical University,  
37 30 Gaotanyan Main St., Shapingba District, Chongqing 400038, China.

38 E-mail: [exploiter001@126.com](mailto:exploiter001@126.com).

39

40 Wenjie Zi, MD

41 Department of Neurology, Xinqiao Hospital, Army Medical University,  
42 No. 183 Xinqiao Main Street, Shapingba District, Chongqing 400038,  
43 China

44 Email: [ziwenjie1981@163.com](mailto:ziwenjie1981@163.com)



46 **Abstract**

47 **Background:** Adjunct intra-arterial thrombolysis has been shown to  
48 potentially improve clinical outcomes in patients with large vessel  
49 occlusion (LVO) stroke who have undergone successful endovascular  
50 thrombectomy (EVT). Tenecteplase, known for its enhanced fibrin  
51 specificity and extended activity duration, may be a better choice than  
52 alteplase for intra-arterial thrombolysis. However, the optimal dose,  
53 safety and efficacy of intra-arterial tenecteplase remain unclear.

54 **Objective:** To evaluate the optimal dose, safety and efficacy of  
55 adjunctive intra-arterial tenecteplase following successful EVT in LVO  
56 patients.

57 **Methods and design:** This study is a two-part, phase Ib/IIa, multicenter,  
58 open-label, 14+8 dose-escalation (Part I) and dose-expansion (Part II)  
59 trial conducted in China involving patients LVO patients who achieved  
60 successful EVT (defined as the expanded Thrombolysis in Cerebral  
61 Infarction [eTICI] grade of 2b50 or higher) within 24 hours of last known  
62 well. In Part Ib, the dose escalation will be conducted in up to four tiers  
63 of 14+8 patients, starting at 0.03125 mg/kg, to a planned maximum of  
64 0.1875mg/kg, and the primary outcome is symptomatic intracranial  
65 hemorrhage within 24 hours. In Part IIa, 157 patients will be randomized  
66 among two selected safe doses and a placebo, and the primary outcome

67 will be the proportion of patients with nondisabled outcome (modified  
68 Rankin Scale score of 0 to 1) at 90 days.

69 **Discussions:** This pivotal trial will provide important data on adjunctive  
70 intra-arterial tenecteplase following successful EVT in patients with acute  
71 ischemic stroke due to LVO and may support advance of treatment  
72 standards.

73 **Trial registry number:** ChiCTR2300073787 and ChiCTR2400080624  
74 ([www.chictr.org.cn](http://www.chictr.org.cn)).

75 **Keywords:** Clinical trial, Tenecteplase, Mechanical thrombectomy,  
76 Acute ischemic stroke, Large vessel occlusion

77

78

79

80

81

82

83

## 84 **Introduction**

85 Stroke is one of the leading causes of morbidity and mortality  
86 worldwide.<sup>1</sup> Endovascular thrombectomy (EVT) is currently  
87 recommended as the gold standard treatment for acute ischemic stroke  
88 caused by large vessel occlusion (LVO).<sup>2</sup> However, a meta-analysis study  
89 consisted of five randomized clinical trials indicated that two-thirds of  
90 patients had disabled (modified Rankin Scale [mRS] 2-6) outcomes after  
91 EVT despite successful reperfusion (defined as the extended  
92 Thrombolysis In Cerebral Infarction [eTICI] grade of 2b50 or higher).<sup>3,4</sup>  
93 Already infarcted tissue present before the procedure, combined with  
94 infarct expansion into areas lacking sufficient macro- and  
95 microcirculatory reperfusion afterward, may lead to incomplete  
96 functional recovery.<sup>5</sup> Previous studies demonstrated that even when  
97 successful reperfusion has been achieved after EVT, hypoperfusion is  
98 common and this is associated with poor clinical outcomes.<sup>6</sup> Preclinical  
99 studies have shown that capillary occlusion, perivascular space  
100 obstruction, or distal microembolism from a proximal thrombus may  
101 cause incomplete reperfusion of the microcirculation and distal  
102 vasculature.<sup>7</sup>

103 Targeting the mirco-thrombi, the Effect of Intra-arterial Alteplase vs  
104 Placebo Following Successful Thrombectomy on Functional Outcomes in  
105 Patients With Large Vessel Occlusion Acute Ischemic Stroke (CHOICE)

106 study showed that adjuvant intra-arterial thrombolysis after successful  
107 reperfusion by EVT could improve excellent functional outcome at 90  
108 days.<sup>8</sup> However, this study was terminated prematurely with a resulting  
109 limited sample size.

110 Tenecteplase is a modified form of alteplase, with a longer half-life  
111 and greater fibrin specificity.<sup>9,10</sup> After extensive exploration, preliminary  
112 research established the optimal dose of intravenous TNK (0.25 mg/kg)  
113 for thrombolysis therapy in stroke.<sup>11</sup> In the Tenecteplase versus Alteplase  
114 before Thrombectomy for Ischemic Stroke (EXTEND-IA TNK) study,  
115 administering tenecteplase (0.25 mg/kg) prior to thrombectomy resulted  
116 in a higher rate of reperfusion and improved functional outcomes  
117 compared to alteplase (0.9 mg/kg) in patients with LVO stroke.<sup>10,12</sup>  
118 Considering the advantages of tenecteplase, adjuvant intra-arterial  
119 administration of tenecteplase may provide greater potential benefits for  
120 patients with LVO stroke following successful reperfusion compared with  
121 alteplase. However, the optimal dose, efficacy, and safety of intra-arterial  
122 tenecteplase following successful reperfusion is unknown.

123 Therefore, we conduct a two-part, phase Ib/IIa, multicenter,  
124 open-label, 14+8 dose-escalation (Part 1) and dose-expansion (Part 2)  
125 trial to determine the most promising dose to advance to a pivotal trial of  
126 intra-arterial tenecteplase following successful thrombectomy in patients  
127 with acute ischemic stroke due to LVO within 24h of symptom onset.

128 **Methods**

129 **Study design**

130 The Safety and Efficacy of Adjunctive Intra-arterial Tenecteplase  
131 following Successful Thrombectomy in Patients with Large Vessel  
132 Occlusion (DATE) is an open-label, randomized, multicenter, Phase Ib/IIa  
133 clinical trial designed to identify a dose of intra-arterial tenecteplase  
134 following successful EVT in patients with acute ischemic stroke due to  
135 LVO that shows sufficient evidence of safety and efficacy to advance to a  
136 pivotal trial. In designing this protocol, we adhered to the SPIRIT  
137 reporting guidelines<sup>13</sup> for clarity and consistency. The DATE trial will be  
138 divided into two parts: the first part (Phase Ib) is a pilot dose-escalation  
139 safety study, and the second part (Phase IIa) is an exploratory study to  
140 assess the safety and potential efficacy of adjunctive intra-arterial  
141 tenecteplase after successful EVT in patients with LVO stroke at two  
142 different doses. After the completion of Phase Ib, a data safety monitoring  
143 board (DSMB) unblinded to study groups will select 2 doses (A or B) to  
144 be tested in Phase IIa according to the initial safety results.

145 **Dose Escalation (Phase Ib):**

146 This is a dose escalation trial. During this phase, participants will  
147 receive intra-arterial administration of increasing doses of tenecteplase  
148 after successful EVT. Patients will be treated with up to 4 escalating dose



149 levels: 0.03125 mg/kg (1/8 *i.v* dose), 0.0625 mg/kg (1/4 *i.v* dose), 0.125  
150 mg/kg (1/2 *i.v* dose), and 0.1875 mg/kg (3/4 *i.v* dose).

151 According to the Chinese Acute Anterior Circulatory Ischemic  
152 Stroke Endovascular Treatment Registry Study, 13.8% of patients  
153 experienced symptomatic intracranial hemorrhage (sICH) within 24 hours  
154 of receiving EVT.<sup>14</sup> Using sample sizes typical for dose escalation phase I  
155 clinical trials<sup>15,16</sup>, we will use a 14+8 design scheme with sICH  
156 occurrence within 24 hours after EVT as the dose-limiting toxicity. At  
157 each tier, 14 patients will initially be enrolled. If fewer than 2 of 14  
158 subjects develop sICH, the trial will advance to the next tier. If 2 of the 14  
159 develop sICH, 8 more patients will be enrolled at that dose. If 0-1 of the  
160 additional 8 patients develops sICH, the trial will advance to the next tier.  
161 If 2 of the additional 8 patients develops sICH or 3 of the first 14 develop  
162 sICH, that dose will be deemed not tolerated and the immediately  
163 preceding dose will be the estimated maximum tolerated dose. The chart  
164 is shown in Figure 1.

165 **Dose Expansion (Phase IIa):**

166 Two doses (A and B) will be chosen by the DSMB and investigators  
167 jointly according to the results in Phase Ib. In Phase II, a total of 157 new  
168 patients will be enrolled, with 46 patients assigned to the dose A group,  
169 46 patients assigned to the dose B group, and an additional 65 patients  
170 allocated to the control group.

171 During this phase, 3 arms will be studied and patients will be  
172 randomized with stratification allocation according to two strata: patient  
173 age (<70 vs  $\geq$  70 years), and admission NIHSS score (< 15 vs  $\geq$  15), to  
174 receive 1 of the 2 selected doses of tenecteplase, or to the control group in  
175 a 1:1: $\sqrt{2}$  ratio, which in turn yields probabilities of assignment of 0.293,  
176 0.293, and 0.414, respectively. Patients will be randomly assigned by  
177 using a real-time internet-based system. This process is automated which  
178 allows for concealment of the sequence of allocation.

179 **Objectives:** The primary objective of this study is to preliminarily assess  
180 the safety and efficacy of adjunctive intra-arterial tenecteplase at different  
181 doses following successful EVT in patients with acute ischemic stroke  
182 due to LVO to determine the promising dose to advance to a pivotal trial.

183 **Outcome:** The study is designed to have two parts with different  
184 outcomes.

### 185 **Dose Escalation (Phase Ib)**

186 • **Primary outcome:** The primary outcome is sICH within 24 hours.

187 • **Secondary outcome:**

188 1) 90-day modified mRS score 0-1 (%);

189 2) Proportion of patients with functional independence (mRS  
190 score 0 to 2) at 90 days ;

191 3) Level of disability (ordinal distribution of mRS scores) at 90  
192 days ;

193 4) Favorable shift in reperfusion on the eTICI score after  
194 intra-arterial tenecteplase thrombolysis therapy. All post-EVT, pre-IA  
195 and final post-IA final, angiograms will be scored at a core lab by  
196 central and blinded reviewers using the eTICI and classified as  
197 eTICI2b, eTICI2c, and eTICI3. The post treatment angiographies will  
198 be scored using the eTICI and classified as “improved”, “worsened”  
199 or “unchanged” with regard to the pre-IA infusion eTICI score.

200 5) The change from baseline of the NIHSS score to 5–7 days or  
201 discharge if earlier ;

202 6) EQ-5D-3L at 90 days ;

203 7) Mortality within 90 days.

204 .

#### 205 **Dose Expansion (Phase IIa):**

206 • **Primary outcome:** The primary outcome will be the proportion of  
207 patients with a nondisabled outcome (mRS score of 0 or 1) at 90 ( $\pm 14$ )  
208 days. Primary outcome assessments will be performed at 90 ( $\pm 14$ ) days  
209 by two independent, certified physicians who are blinded to the treatment  
210 details. To maintain the reliability, accessibility, and traceability of the  
211 mRS score, we will retain a video or audio records of the 90-day  
212 follow-up for all patients. If video or audio recordings are unavailable,  
213 outcomes will be determined in-person by certified local investigators,  
214 who will be also unaware of the treatment assignment.

215       • ***Secondary outcomes:***

216       1) Proportion of patients with functional independence (mRS score 0

217 to 2) at 90 days;

218       2) Level of disability (ordinal distribution of mRS scores) at 90 days ;

219       3) Favorable shift in eTICI score after intra-arterial tenecteplase

220 thrombolysis therapy ;

221       4) The change of the NIHSS score from baseline to 5–7 days or

222 discharge ;

223       5) EQ-5D-3L at 90 days ;

224       6) sICH rate within 24 hours ;

225       7) Mortality within 90 days.

226       **Inclusion and exclusion criteria**

227       **Inclusion criteria**

228       1) Age  $\geq 18$  years;

229       2) Time from last known well within 24 hours;

230       3) Large vessel occlusive stroke in the anterior circulation confirmed

231 by computed tomography angiography/magnetic resonance angiography,

232 including intracranial segment of the internal carotid artery, first or

233 second segment of the middle cerebral artery;

234       4) Alberta Stroke Program Early CT Score (ASPECTS)  $\geq 6$  based on

235 non-contrast computed tomography;

236       5) National Institutes of Health Stroke Scale (NIHSS) score  $\geq 6$ ;

- 237 6) Successful endovascular thrombectomy (eTICI 2b-3);
- 238 7) Total pass numbers of thrombectomy procedure  $\leq 3$ ;
- 239 8) Written informed consent signed by patient or their family
- 240 member.

241 **Exclusion criteria**

- 242 1) NIHSS score  $\geq 25$ ;
- 243 2) Intracranial hemorrhage confirmed by computed tomography or
- 244 magnetic resonance imaging;
- 245 3) Treated by intravenous thrombolysis;
- 246 4) Prestroke mRS score  $\geq 2$ .
- 247 5) Intraprocedural digital subtraction angiography suggests vessel
- 248 penetration, dissection, or extravasation of contrast medium;
- 249 6) Pregnant or lactating patients;
- 250 7) Allergic to contrast agent or Tenecteplase;
- 251 8) Systolic pressure greater than 185 mmHg or diastolic pressure
- 252 greater than 110 mmHg despite blood pressure lowering treatment;
- 253 9) Genetic or acquired bleeding disposition with anticoagulation
- 254 factor deficiency or already taking oral anticoagulants within 48 hours
- 255 and INR  $> 1.7$ ;
- 256 10) Blood glucose  $< 2.8$  mmol/L (50 mg/dl) or  $> 22.2$  mmol/L (400
- 257 mg/dl), platelets  $< 90 \times 10^9/L$ ;

258 11) History of bleeding in the last 1 month (gastrointestinal and  
259 urinary tract bleeding);

260 12) Patients on chronic hemodialysis and severe renal insufficiency  
261 (glomerular filtration rate < 30 ml/min or blood creatinine > 220  $\mu$ mol/L  
262 [2.5mg/dl]);

263 13) Any terminal illness with a life expectancy of less than 6  
264 months;

265 14) Intracranial aneurysm, arteriovenous malformation;

266 15) Brain tumor with occupying mass effect on imaging;

267 16) Puncture to reperfusion time > 90 min;

268 17) Current participation in another clinical trial;

269 18) Unlikely to be available for 90-day follow-up.

### 270 **Participating center eligibility**

271 To qualify for participation in this trial, study centers will be  
272 mandated to have performed a minimum of 50 endovascular procedures  
273 each year. Additionally, all neurointerventionists involved will be  
274 required to have over five years of experience in cerebrovascular  
275 interventions, along with a track record of having performed at least 30  
276 cases of mechanical thrombectomy using stent retriever devices annually.

### 277 **Enrollment**

278 Before initiating any procedure, participants or their legally  
279 authorized representatives will be provided with comprehensive oral and

280 written information regarding the study, encompassing its objectives,  
281 potential risks, and anticipated benefits. Subsequently, they will be  
282 required to give their informed consent.

283 All individuals who fulfill the specified eligibility criteria are  
284 eligible for enrollment in the DATE clinical trial.

### 285 **Study Intervention**

286 Eligible patients assigned to the tenecteplase group will undergo an  
287 infusion of intra-arterial tenecteplase with the assigned dose. This  
288 infusion will be administered through a distal access catheter or  
289 microcatheter positioned proximal to the initially occluded artery.  
290 Patients allocated to the control group will terminate the procedure  
291 without further intraarterial thrombolysis.

292 All enrolled patients should be monitored in the acute stroke unit  
293 and can be admitted to the intensive care unit if necessary. All enrolled  
294 patients will undergo standardized medical treatment management and  
295 subsequent secondary preventive medication according to the Chinese  
296 Guidelines for Endovascular Treatment of Acute ischemic Stroke 2018.<sup>17</sup>

### 297 **Blinding and masking**

298 Each participating site will allocate one or more physicians to  
299 perform follow-up evaluations at 24-hour intervals, between five to seven  
300 days post-treatment, or at the time of discharge if it occurs sooner, along  
301 with a 90-day assessment. It is imperative that these physicians are not

302 involved in the subject's initial treatment to ensure their blinding to the  
303 treatment assignment.

#### 304 **Data safety monitoring board**

305 The independent Data and Safety Monitoring Committee (DSMB) is  
306 responsible for reviewing the aggregated data and determining the study  
307 safety endpoints. The DSMB regularly reviews the study data added  
308 during the trial and advises the sponsor on the continued safety of the  
309 subjects and those not yet included in the study. The DSMB advises on  
310 the continued effectiveness and scientific value of the study.

#### 311 **Sample size estimates**

##### 312 ***Dose Escalation (Phase Ib):***

313 The Endovascular Treatment for Acute Anterior Circulation  
314 Ischemic Stroke registry in China showed that the incidence of sICH  
315 within 24 hours after EVT was 13.8%.<sup>14</sup> Based on this data, we designed  
316 a 14+8 enrollment plan as follows:

317 1) 14 subjects will be included in the trial for the first time for each  
318 dose;

319 2) If <2 DLT (dose limit toxicity) symptomatic intracranial  
320 hemorrhages occur within 24 hours after EVT, the trial advances to the  
321 next dose level;

322 3) If 2/14 DLT, then include 8 more people at the same dose;

323 4) If 2/14+0-1/8DLT (13.6%), proceed to the next dose level;



324 5) If 2/14+2/8 DLT (18.2%) or 3/14 DLT, then this dose is deemed  
325 unsafe and the prior lower dose is the MTD.

326 ***Dose Expansion (Phase IIa):***

327 In Phase IIa randomization will allocate to randomize 46 subjects each  
328 into dose group A and dose group B, and 65 subjects into the control  
329 group in a 1:1: $\sqrt{2}$  ratio. This approach is similar to the sample size  
330 calculation method used in the APRIL study.<sup>18</sup>

331

332 **Statistical analyses**

333 Continuous variables will be summarized with the median, the  
334 inter-quartile range, the minimum, and the maximum. Categorical  
335 variables will be summarized with counts and percentages. Patient  
336 compliance with eligibility criteria and treatment administration, major  
337 protocol non-compliance, patient withdrawal and the reason for  
338 withdrawal (e.g., adverse event, protocol non-compliance, lost to follow  
339 up, failed to return, consent withdrawal, and other reasons) and  
340 assignment to each analysis population will be summarized using  
341 appropriate statistics by treatment arms.

342 The statistical results of outcome analyses will be provided with  
343 point estimates of treatment differences with 95% confidence intervals  
344 (CIs).

345 The primary outcome in both phase Ib and IIa will be analyzed using  
346 generalized linear models from which a risk ratio with its 95% CI will be  
347 estimated as a measurement of treatment effect. The secondary outcomes  
348 and safety outcomes (binary, continuous and ordinal) will be analyzed  
349 using generalized linear models. For non-normal continuous outcome, a  
350 win ratio will be estimated as a measurement of treatment effect. A  
351 pooled analysis that combines the phase Ib and phase IIa will be  
352 performed as supportive analysis. The primary data analyses will adhere  
353 to the intention-to-treat principle. Additionally, per-protocol analyses will  
354 be conducted as supplementary analyses.

355 All statistical analyses will be described in detail in the statistical  
356 analysis plan which will be finalized before the study database lock, and  
357 will be performed using SAS version 9.4 (SAS Institute) and R version  
358 4.4.0 or higher (R Foundation for Statistical Computing). The reporting  
359 of trial results will conform to the Consolidated Standards of Reporting  
360 Trials guidelines for randomized trials.

### 361 **Ethical considerations**

362 The study adheres to the ethical guidelines outlined in the Declaration of  
363 Helsinki. The protocol was approved by the Ethics Committee of the First  
364 Affiliated Hospital of the Army Medical University and all participating  
365 centers. Any modifications to the trial protocol will only be executed after  
366 obtaining further approval from the ethics committee.

367 **Discussion**

368 Despite advancements in thrombectomy devices and workflow processes,  
369 outcomes for patients with LVO remain suboptimal. Adjunctive  
370 intra-arterial thrombolysis following successful reperfusion in patients  
371 with LVO stroke has the potential to improve functional outcomes, while  
372 the optimal dose remains unclear. To our knowledge, the DATE trial is  
373 the first to evaluate the safety, efficacy, and dose-response effects of  
374 intra-arterial tenecteplase in patients with LVO stroke after successful  
375 EVT.

376 The CHOICE study demonstrated the potential benefits of  
377 intra-arterial alteplase at a dose equivalent to 1/4 of the standard  
378 intravenous thrombolytic dose for patients with acute ischemic stroke due  
379 to LVO following successful recanalization.<sup>8</sup> However, it did not conduct  
380 a dose escalation exploratory trial, leaving the ideal dose that balances  
381 efficacy and safety unknown.

382 Tenecteplase, a third-generation thrombolytic drug, has  
383 demonstrated superiority over alteplase in improving excellent functional  
384 outcomes and reducing disability at 3 months.<sup>19</sup> There is an important  
385 need to determine which dose provides the best balance of efficacy and  
386 safety in patients with LVO following successful EVT. Current trials  
387 such as POST-TNK<sup>20</sup> and ANGEL-TNK<sup>21</sup> are exploring different doses  
388 of intra-arterial tenecteplase in patients with acute ischemic stroke due to

389 LVO following successful EVT, using doses of 0.0625 mg/kg, 0.0625  
390 mg/kg, and 0.125 mg/kg, respectively. However, the IA doses in these  
391 trials were determined based on a similar fraction of the IV alteplase dose  
392 used in CHOICE (one fourth) or were based on trial steering committee  
393 recommendation, rather than dose-escalation study. Therefore, this study  
394 will provide insight to characterize the optimal dose of adjunctive  
395 intra-arterial tenecteplase administration in these patients.

396 The DATE trial enrolled its first patient on July 27, 2023, and as of  
397 August 25, 2024 has enrolled 205 subjects. Full study completion  
398 (including collection on 3-month outcomes) is expected by November  
399 2024. When completed, this trial will provide pivotal data allowing  
400 assessment of the optimal dose, safety, and efficacy of intra-arterial  
401 tenecteplase in patients with acute ischemic stroke due to LVO following  
402 successful EVT.

#### 403 **Funding**

404 The project was supported by the Key Project of Chongqing Science  
405 (2023ZDXM025), National Natural Science Foundation of China (No.  
406 82425021), and Health Joint Medical Research Project and the Major  
407 Project of Clinical Research Incubation at the First Affiliated Hospital of  
408 Army Medical University (2023IITZD01).

#### 409 **Conflicts of interest**

410 The author(s) declare the following potential conflicts of interest with

411 respect to the research, authorship, and/or publication of this article: JLS  
412 reports consulting fees for advising on rigorous and safe clinical trial  
413 design and conduct from Biogen, Boehringer Ingelheim, Genentech,  
414 Johnson & Johnson, Phenox, Phillips, Rapid Medical, and Roche. TNN  
415 discloses Associate Editor of Stroke, advisory board of Aruna Bio and,  
416 Brainomix. RGN reports consulting fees for advisory roles with  
417 Anaconda, Biogen, Cerenovus, Genentech, Philips, Hybernia, Hyperfine,  
418 Imperative  
419 Care, Medtronic, Phenox, Philips, Prolong Pharmaceuticals, Stryker  
420 Neurovascular, Shanghai Wallaby, Synchron, and stock options for  
421 advisory roles with Astrocyte, Brainomix, Cerebrotech, Ceretrieve,  
422 Corindus Vascular Robotics, CrestecBio Inc., Euphrates Vascular, Inc.,  
423 Vesalio, Viz-AI, RapidPulse and Perfuze. RGN is one of the Principal  
424 Investigators of ENDOLOW trial. Funding for this project is provided by  
425 Cerenovus. RGN is the Principal Investigator of the DUSK trial. Funding  
426 for this project is provided by Stryker Neurovascular. RGN is an investor  
427 in Viz-AI, Perfuze, Cerebrotech, Reist/Q'Apel Medical, Truvic, Tulavi  
428 Therapeutics, Vastrax, Piraeus Medical, Brain4Care, Quantanosis AI, and  
429 Viseon. T.Nguyen reports Associate Editor of Stroke; advisory board of  
430 Brainomix, Aruna Bio; speaker for Genentech and Kaneka. Other  
431 author(s) declare no potential conflicts of interest with respect to the  
432 research, authorship, and/or publication of I article.

### 433 **Contributorship:**

434 ZZ, WZ, XH, DW, JLS, TNN, and RGN designed and conceptualized the  
435 study. XH, JH, CG, YH, LW, LC, QL, JW, and MW participated in data  
436 collection. XH, YH, JH, and CG wrote the manuscript. All authors  
437 critically revised and approved the manuscript.

### 438 **Acknowledgement**

439 None.

### 440 **References**

- 441 1. Global, regional, and national burden of stroke and its risk factors, 1990-2019: a systematic  
442 analysis for the Global Burden of Disease Study 2019. *The Lancet Neurology*.  
443 2021;20(10):795-820.
- 444 2. Powers WJ, Rabinstein AA, Ackerson T, et al. Guidelines for the Early Management of Patients  
445 With Acute Ischemic Stroke: 2019 Update to the 2018 Guidelines for the Early Management  
446 of Acute Ischemic Stroke: A Guideline for Healthcare Professionals From the American Heart  
447 Association/American Stroke Association. *Stroke*. 2019;50(12):e344-e418.
- 448 3. Goyal M, Menon B, van Zwam W, et al. Endovascular thrombectomy after large-vessel  
449 ischaemic stroke: a meta-analysis of individual patient data from five randomised trials.  
450 *Lancet (London, England)*. 2016;387(10029):1723-1731.
- 451 4. Liebeskind DS, Bracard S, Guillemin F, et al. eTICI reperfusion: defining success in  
452 endovascular stroke therapy. *J Neurointerv Surg*. 2019;11(5):433-438.
- 453 5. Ng F, Churilov L, Yassi N, et al. Prevalence and Significance of Impaired Microvascular Tissue  
454 Reperfusion Despite Macrovascular Angiographic Reperfusion (No-Reflow). *Neurology*.  
455 2022;98(8):e790-e801.
- 456 6. Laredo C, Rodriguez A, Oleaga L, et al. Adjunct Thrombolysis Enhances Brain Reperfusion  
457 following Successful Thrombectomy. *Ann Neurol*. 2022;92(5):860-870.
- 458 7. Jia M, Jin F, Li S, et al. No-reflow after stroke reperfusion therapy: An emerging phenomenon  
459 to be explored. *CNS neuroscience & therapeutics*. 2024;30(2):e14631.
- 460 8. Renú A, Millán M, San Román L, et al. Effect of Intra-arterial Alteplase vs Placebo Following  
461 Successful Thrombectomy on Functional Outcomes in Patients With Large Vessel Occlusion  
462 Acute Ischemic Stroke: The CHOICE Randomized Clinical Trial. *Jama*. 2022;327(9):826-835.
- 463 9. Tsvigoulis G, Katsanos AH, Sandset EC, et al. Thrombolysis for acute ischaemic stroke: current  
464 status and future perspectives. *The Lancet Neurology*. 2023;22(5):418-429.
- 465 10. Coutts SB, Berge E, Campbell BC, Muir KW, Parsons MW. Tenecteplase for the treatment of  
466 acute ischemic stroke: A review of completed and ongoing randomized controlled trials.

- 467 *International journal of stroke : official journal of the International Stroke Society.*  
468 2018;13(9):885-892.
- 469 11. Campbell BCV, Mitchell PJ, Churilov L, et al. Effect of Intravenous Tenecteplase Dose on  
470 Cerebral Reperfusion Before Thrombectomy in Patients With Large Vessel Occlusion Ischemic  
471 Stroke: The EXTEND-IA TNK Part 2 Randomized Clinical Trial. *Jama.* 2020;323(13):1257-1265.
- 472 12. Campbell BC, Mitchell PJ, Kleinig TJ, et al. Endovascular therapy for ischemic stroke with  
473 perfusion-imaging selection. *N Engl J Med.* 2015;372(11):1009-1018.
- 474 13. Chan AW, Tetzlaff JM, Gøtzsche PC, et al. SPIRIT 2013 explanation and elaboration: guidance  
475 for protocols of clinical trials. *BMJ (Clinical research ed).* 2013;346:e7586.
- 476 14. Zhang X, Xie Y, Wang H, et al. Symptomatic Intracranial Hemorrhage After Mechanical  
477 Thrombectomy in Chinese Ischemic Stroke Patients: The ASIAN Score. *Stroke.*  
478 2020;51(9):2690-2696.
- 479 15. Huang JH, Su QM, Yang J, et al. Sample sizes in dosage investigational clinical trials: a  
480 systematic evaluation. *Drug design, development and therapy.* 2015;9:305-312.
- 481 16. Yuan Y, Hess KR, Hilsenbeck SG, Gilbert MR. Bayesian Optimal Interval Design: A Simple and  
482 Well-Performing Design for Phase I Oncology Trials. *Clinical cancer research : an official*  
483 *journal of the American Association for Cancer Research.* 2016;22(17):4291-4301.
- 484 17. Wang Y, Han S, Qin H, et al. Chinese Stroke Association guidelines for clinical management of  
485 cerebrovascular disorders: executive summary and 2019 update of the management of  
486 high-risk population. *Stroke and vascular neurology.* 2020;5(3):270-278.
- 487 18. Hernández-Jiménez M, Abad-Santos F, Cotgreave I, et al. Safety and Efficacy of ApTOLL in  
488 Patients With Ischemic Stroke Undergoing Endovascular Treatment: A Phase 1/2 Randomized  
489 Clinical Trial. *JAMA neurology.* 2023;80(8):779-788.
- 490 19. Palaiodimou L, Katsanos AH, Turc G, et al. Tenecteplase vs Alteplase in Acute Ischemic Stroke  
491 Within 4.5 Hours: A Systematic Review and Meta-Analysis of Randomized Trials. *Neurology.*  
492 2024;103(9):e209903.
- 493 20. Jiacheng Huang CG, Jie Yang, Xiaolei Shi, Chang Liu, Jiaying Song, Fengli Li, Weilin Kong, Shitao  
494 Fan, Zhouzhou Peng, Shihai Yang, Jinfu Ma, Xu Xu, Linyu Li, Zhixi Wang, Nizhen Yu, Wenzhe  
495 Sun, Chengsong Yue, Xiang Liu, Dahong Yang, Cheng Huang, Duolao Wang, Raul G. Nogueira,  
496 Thanh N. Nguyen, Jeffrey L. Saver, Yangmei Chen, Wenjie Zi. Adjunctive Intra-arterial  
497 Tenecteplase after Successful Endovascular Thrombectomy in Patients with Large Vessel  
498 Occlusion Stroke (POST-TNK): Study Rationale and Design. *European Stroke Journal.* 2024.
- 499 21. Huo X, Luo G, Sun D, et al. Intra-arterial tenecteplase after successful endovascular therapy  
500 (ANGEL-TNK): protocol of a multicentre, open-label, blinded end-point, prospective,  
501 randomised trial. *Stroke and vascular neurology.* 2024.

502

503

504

505 Figure 1. Flow chart for the Phase I of the DATE trial.

506



Dose level  $i$

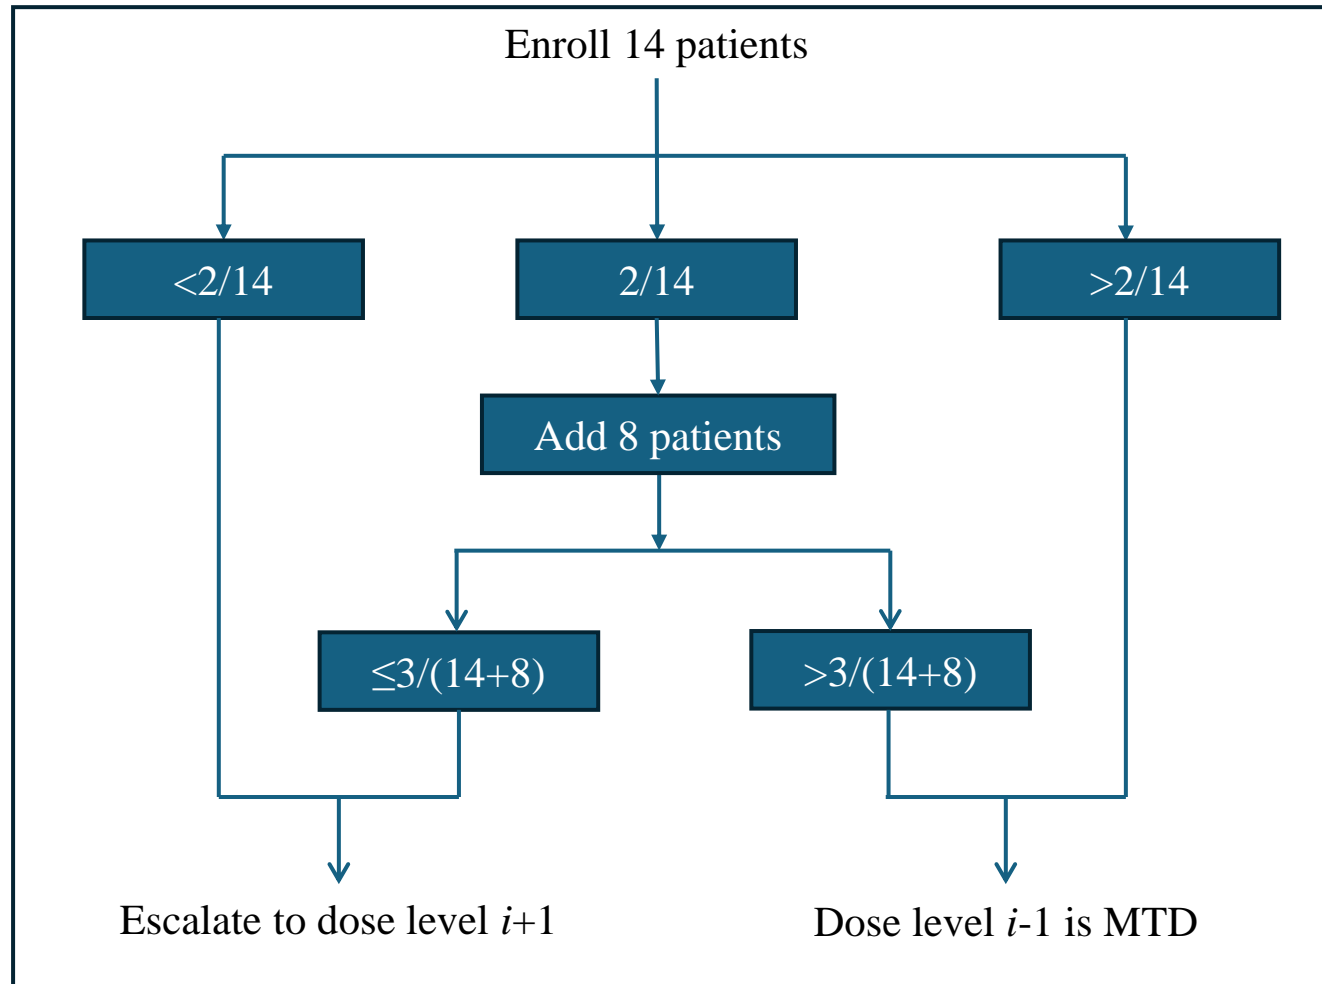

Source: https://medrxiv.org/content/10.1101/2024.11.17.24317449v1.full.pdf
